# Supplementary material
Source: PubMed Central journal article supplement (PMC5313083)

**Figure S2.** HPLC analysis of the partial products of (GlcNAc)<sub>6</sub> hydrolysis by different chitinases.

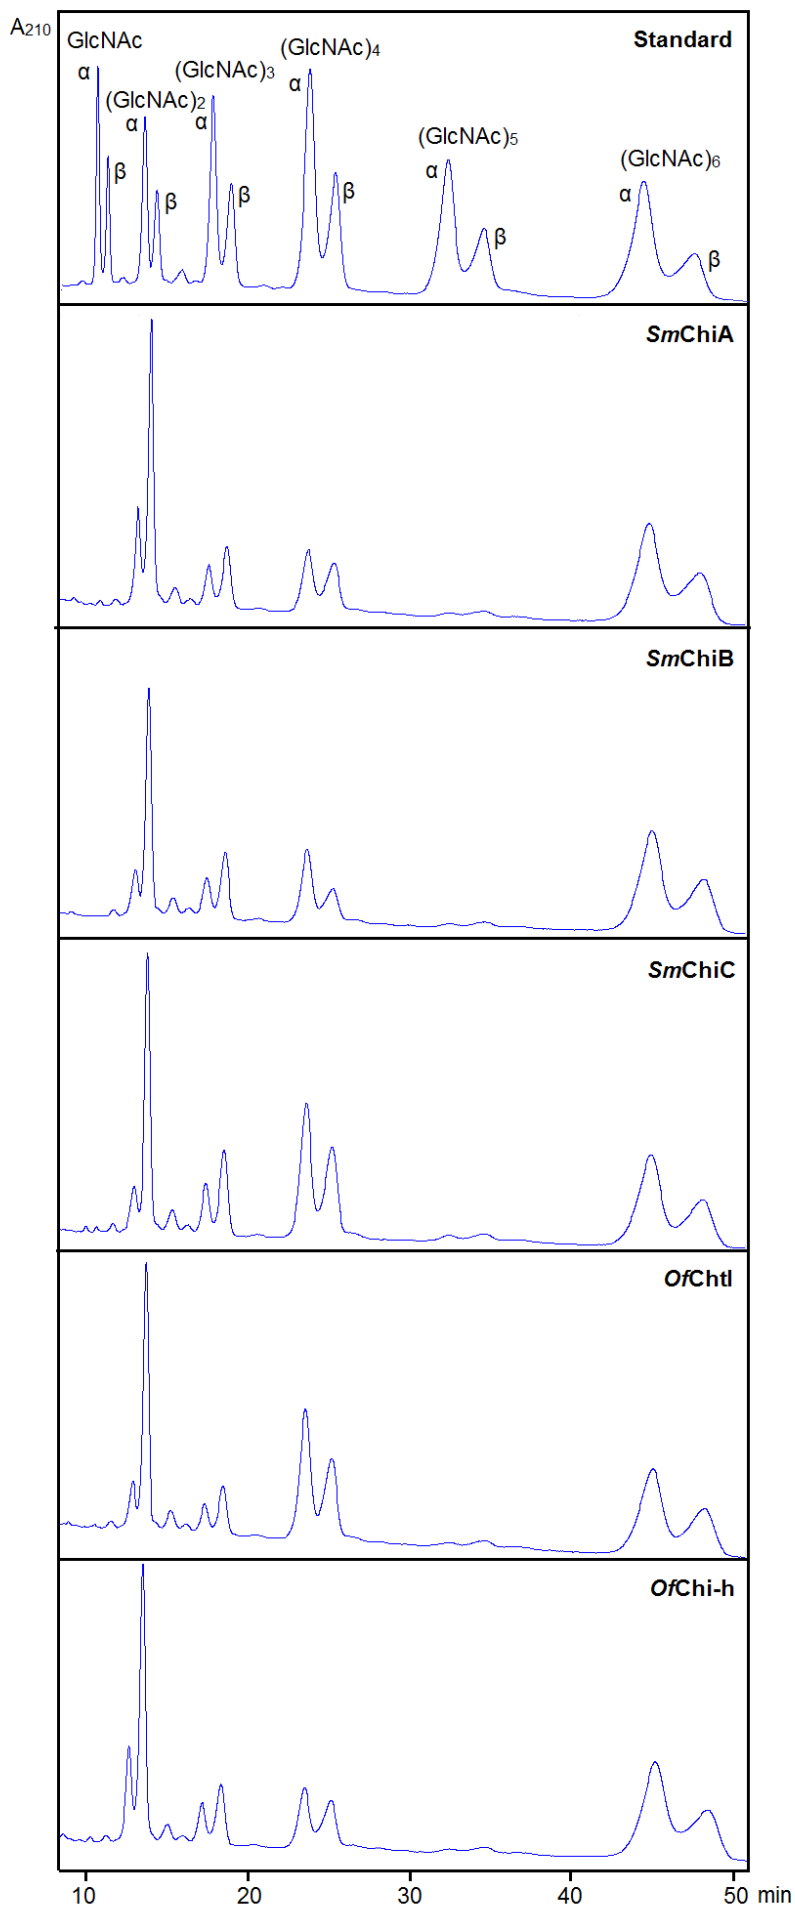

Supplement: 10.1074_M116.755330_jbc.M116.755330-2.pdf [file 10.1074_M116.755330_jbc.M116.755330-2.pdf]
