# Supplementary material
Source: PubMed Central journal article supplement (PMC5313083)

**Figure S1.** SDS-PAGE of the purified *OfChi-h*.

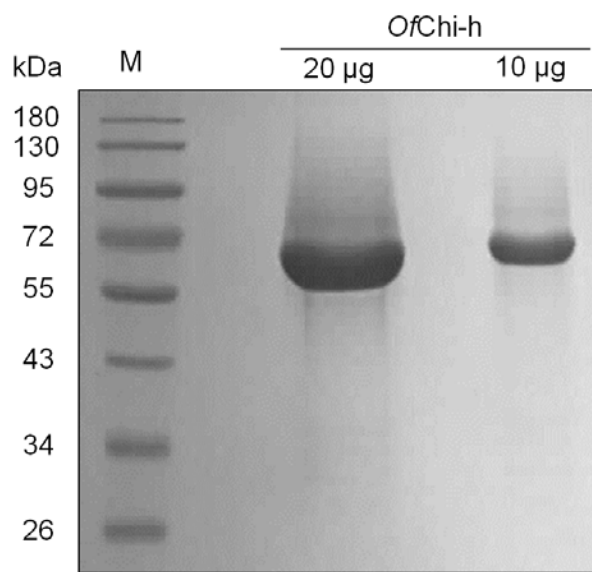

Supplement: 10.1074_M116.755330_jbc.M116.755330-1.pdf [file 10.1074_M116.755330_jbc.M116.755330-1.pdf]
